# Supplementary material for: Magnesium Nanoparticle Synthesis from Powders via Pulsed Laser Ablation in Liquid for Nanocolloid Production
Source: MDPI journal article supplement (doi:10.3390/app112210974), 2021-11-19
Supplement: s1 [file s1]

*Supplementary Materials*

**Table S1.** Nanoparticle size distribution per sample set. 3 types of distributions were observed (bimodal, positively skewed and normal).

| Sample Group | Distribution Type |
|--------------|-------------------|
| 1            | Bimodal           |
| 2            | Normal            |
| 3            | Normal            |
| 4            | Bimodal           |
| 5            | Skewed            |
| 6            | Skewed            |
| 7            | Bimodal           |
| 8            | Skewed            |
| 9            | Normal            |
| 10           | Bimodal           |
| 11           | Skewed            |
| 12           | Normal            |
| 13           | Bimodal           |
| 14           | Skewed            |
| 15           | Skewed            |
| 16           | Bimodal           |
| 17           | Skewed            |
| 18           | Skewed            |
| 19           | Bimodal           |
| 20           | Skewed            |
| 21           | Normal            |
| 22           | Bimodal           |
| 23           | Normal            |
| 24           | Skewed            |
| 25           | Bimodal           |
| 26           | Normal            |
| 27           | Normal            |

## S2. Nanoparticle size distribution for sample 13A

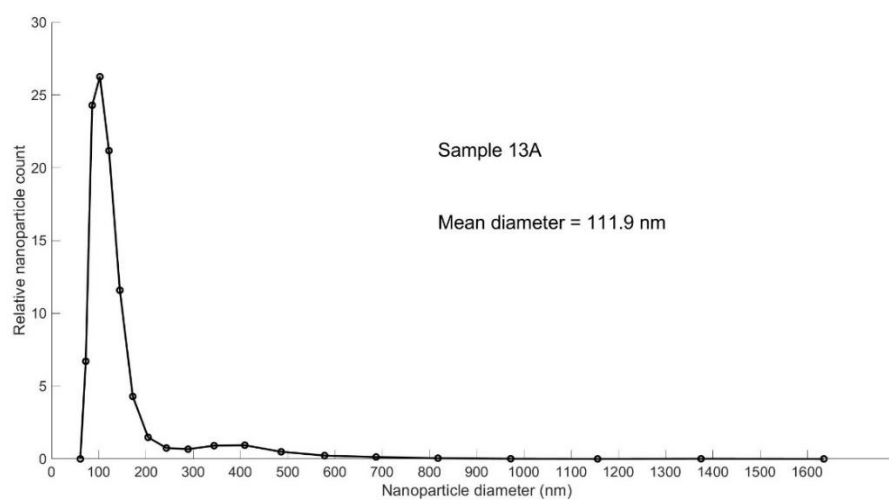

**Figure S1.** Nanoparticle size distribution for sample 13A. A small number of partially fragmented particles (300-60 nm) is observed.
